# Supplementary material for: An In-Silico Pipeline for Rapid Screening of DNA Aptamers against Mycotoxins: The Case-Study of Fumonisin B1, Aflatoxin B1 and Ochratoxin A
Source: PubMed Central journal article supplement (PMC7764985; doi:10.3390/polym12122983), 2020-12-14
Supplement: polymers-12-02983-s001.pdf [file polymers-12-02983-s001.pdf]

# An *in-silico* pipeline for rapid screening of DNA aptamers against mycotoxins: the case-study of fumonisin B1, aflatoxin B1 and ochratoxin A

Fulvio Ciriaco\*<sup>1</sup>, Vincenzo De Leo<sup>1</sup>, Lucia Catucci<sup>1</sup>, Michelangelo Pascale<sup>2</sup>, Antonio F. Logrieco<sup>2</sup>, Maria C. DeRosa<sup>3</sup>, Annalisa De Girolamo\*<sup>2</sup>

<sup>1</sup> Department of Chemistry, University of Bari, Via Orabona 4, Bari, I-70126, Italy; [vincenzo.deleo@uniba.it](mailto:vincenzo.deleo@uniba.it) (V.D.L.); [lucia.catucci@uniba.it](mailto:lucia.catucci@uniba.it) (L.C.).

<sup>2</sup> Institute of Sciences of Food Production (ISPA), CNR-National Research Council of Italy, Via G. Amendola 122/O, 70126 Bari, Italy; [michelangelo.pascale@ispa.cnr.it](mailto:michelangelo.pascale@ispa.cnr.it) (M.P.); [antonio.logrieco@ispa.cnr.it](mailto:antonio.logrieco@ispa.cnr.it) (A.F.L.).

<sup>3</sup> Department of Chemistry, Carleton University, 1125 Colonel by Drive, Ottawa, ON, K1S 5B6, Canada [maria\\_derosa@carleton.ca](mailto:maria_derosa@carleton.ca) (M.C.D.).

\* Correspondence: [fulvio.ciriaco@uniba.it](mailto:fulvio.ciriaco@uniba.it); Tel.: +39.080.544.2041 (F.C.)  
[annalisa.degirolamo@ispa.cnr.it](mailto:annalisa.degirolamo@ispa.cnr.it); Tel.: +39.080.592.9351 (A.D.)

Programs, configuration files and actual input and outputs can be found at:  
[https://github.com/oivulf/dna\\_toxin\\_binding](https://github.com/oivulf/dna_toxin_binding)

Table S1. *In-silico* selectivity tests for aflatoxin B1 (AFB1) aptamers towards ochratoxin A (OTA) and comparison with docking calculations for the target AFB1.

| Aptamer name | Docking energy (kcal/mol) |       |
|--------------|---------------------------|-------|
|              | AFB1                      | OTA   |
| AF_AB3       | -9.2                      | -9.1  |
| AF_APT1      | -10.66                    | -12.6 |

Table S2. *In-silico* selectivity tests for ochratoxin A (OTA) aptamers towards aflatoxin B1 (AFB1) and comparison with docking calculations for the target OTA.

| Aptamer name | Docking energy (kcal/mol) |       |
|--------------|---------------------------|-------|
|              | OTA                       | AFB1  |
| 1.12.2       | -10.38                    | -8.2  |
| A08          | -17.08                    | -12.8 |
| A08min       | -12.05                    | -5.1  |
| H8           | -12.91                    | -10.5 |
| H12          | -9.98                     | -8.9  |

Table S3. Timings (s)

| Aptamer name        | Annealing | Dynamics | Docking:<br>grid generation (20 core) | Docking:<br>space sampling, single pose, mean |
|---------------------|-----------|----------|---------------------------------------|-----------------------------------------------|
| <b>Fumonisin B1</b> |           |          |                                       |                                               |
| FB1_39              | 41358     | 109729   | 720                                   | 6325                                          |
| FB1_39T3            | 39000     | 78500    | 835                                   | 5131                                          |
| FB1_10              | 49698     | 81250    | 735                                   | 1500                                          |
| <b>Aflatoxin B1</b> |           |          |                                       |                                               |
| AF_AB3              | 43272     | 69537    | 360                                   | 93                                            |
| AF_APT1             | 49345     | 78681    | 280                                   | 105                                           |
| <b>Ochratoxin A</b> |           |          |                                       |                                               |
| 1.12.2              | 17567     | 27912    | 481                                   | 123                                           |
| A08                 | 45211     | 71216    | 475                                   | 74                                            |
| A08min              | 20900     | 34216    | 417                                   | 55                                            |
| H8                  | 38385     | 61370    | 312                                   | 55                                            |
| H12                 | 37150     | 60121    | 312                                   | 53                                            |
